# Supplementary material for: Highly efficient visible-light-driven photocatalytic activities in synthetic ordered monoclinic BiVO4 quantum tubes–graphene nanocomposites
Source: Royal Society of Chemistry journal article supplement (doi:10.1039/c2nr30371j), 2012-01-01
Supplement: c2nr30371j.pdf [file c2nr30371j.pdf]

## Highly Efficient Visible-Light-Driven Photocatalytic Activities in Synthetic Ordered Monoclinic BiVO<sub>4</sub> Quantum Tubes-Graphene Nanocomposites

Yongfu Sun,<sup>1,2</sup> Bingyan Qu,<sup>1</sup> Qin Liu,<sup>2</sup> Shan Gao,<sup>1</sup> Zixian Yan,<sup>1</sup> Wensheng Yan,<sup>2</sup> Bicao Pan,<sup>1</sup> Shiqiang Wei<sup>\*2</sup> and Yi Xie<sup>\*1</sup>

1 Hefei National Laboratory for Physical Sciences at Microscale, University of Science & Technology of China, Hefei, 230026, P.R. China, Fax: 86 551 3606266; Tel: 86 551 3603987; E-mail: [yxie@ustc.edu.cn](mailto:yxie@ustc.edu.cn)

2 National Synchrotron Radiation Laboratory, University of Science and Technology of China, Hefei, Anhui 230029, P.R. China, Fax: 86 551 5141078; Tel: 86 551 3601997; E-mail: [sqwei@ustc.edu.cn](mailto:sqwei@ustc.edu.cn)

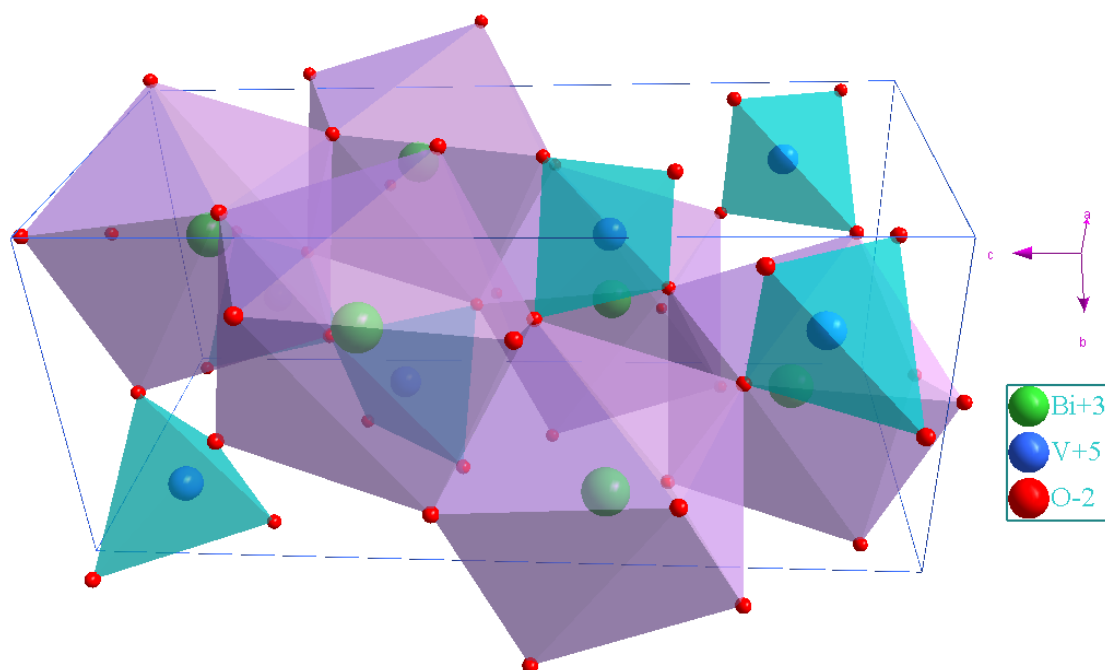

**Figure S1.** Schematic crystal structure of monoclinic BiVO<sub>4</sub>. The structure of m-BiVO<sub>4</sub> consists of corner-sharing BiO<sub>8</sub> dodecahedra and VO<sub>4</sub> tetrahedra. The presence of a Bi–O dodecahedral distortion due to the 6s<sup>2</sup> lone pair of Bi<sup>3+</sup> and a calculated band gap of 2.2 eV makes it suitable for a visible-light-driven photocatalyst, with the potential applications in purifying polluted water resources.

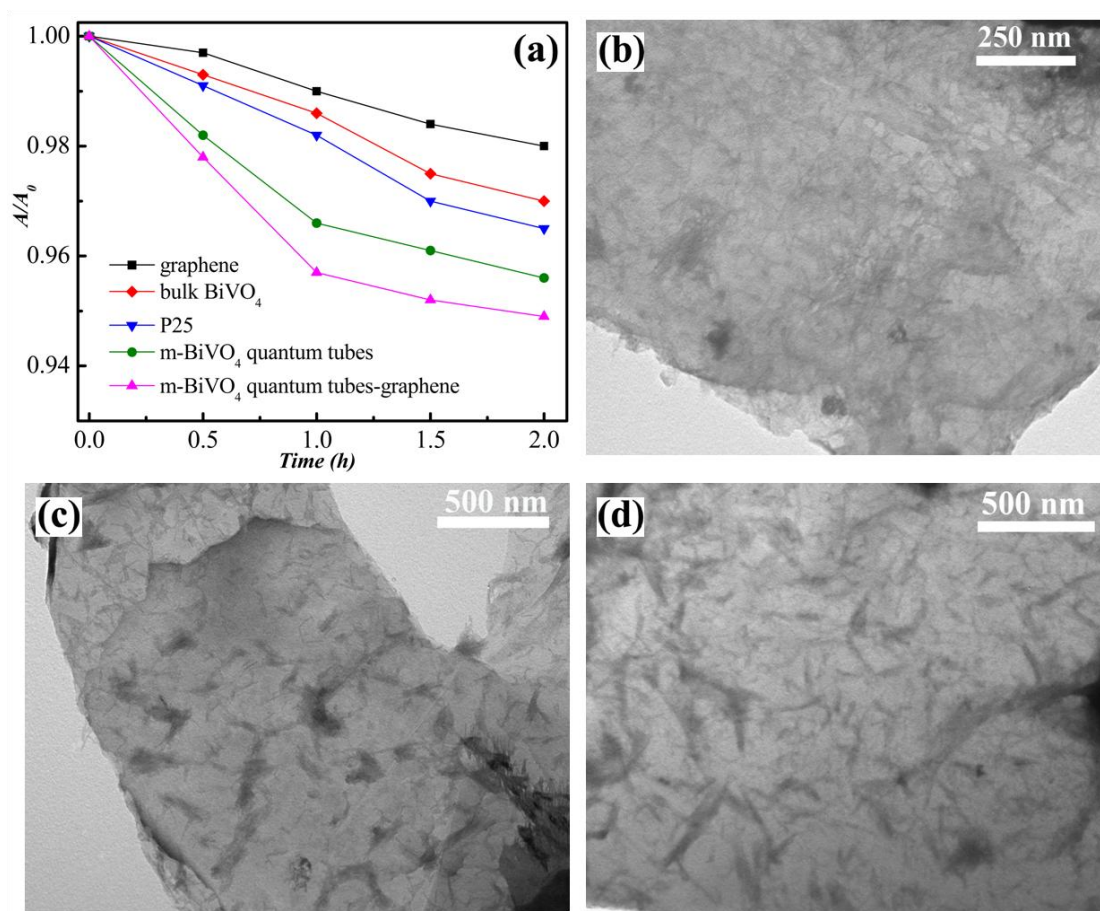

**Figure S2.** (a) Concentration change curves of dye molecules over pure graphene, P25, bulk BiVO<sub>4</sub>, monoclinic BiVO<sub>4</sub> quantum tubes and ordered monoclinic BiVO<sub>4</sub> quantum tubes-graphene nanocomposites under dark, taking the rhodamine B as an example; TEM images of ordered monoclinic BiVO<sub>4</sub> quantum tubes-graphene nanocomposites after visible-light photodegradation of (b) rhodamine B molecules, (c) methylene blue molecules and (d) methyl orange molecules.

Figure S2a shows the concentration change curves of dye molecules in the dark over pure graphene, P25, bulk BiVO<sub>4</sub>, monoclinic BiVO<sub>4</sub> quantum tubes and ordered monoclinic BiVO<sub>4</sub> quantum tubes-graphene nanocomposites, taking the rhodamine B as an example. As displayed in Figure S2a, one can clearly see that there are no obvious differences in the adsorbance of rhodamine B among the above five materials, inferring that the process of adsorption equilibrium in dark do not have an apparent influence on the estimation of their photocatalytic properties. Figures S2b, c and d

depict the TEM images of ordered monoclinic BiVO<sub>4</sub> quantum tubes-graphene nanocomposites after visible-light photodegradation of rhodamine B, methylene blue and methyl orange. Obviously, the morphologies of ordered monoclinic BiVO<sub>4</sub> quantum tubes-graphene nanocomposites in Figures S2b-d have no obvious variations after the measurement of photocatalytic properties, clearly revealing their excellent durability.
